# Supplementary material for: Dicer-2 promotes mRNA activation through cytoplasmic polyadenylation
Source: PubMed Central journal article supplement (PMC5855953; doi:10.1261/rna.065417.117), 2018-04
Supplement: supp_065417.117_Supplemental_Fig_S2.pdf [file supp_065417.117_Supplemental_Fig_S2.pdf]

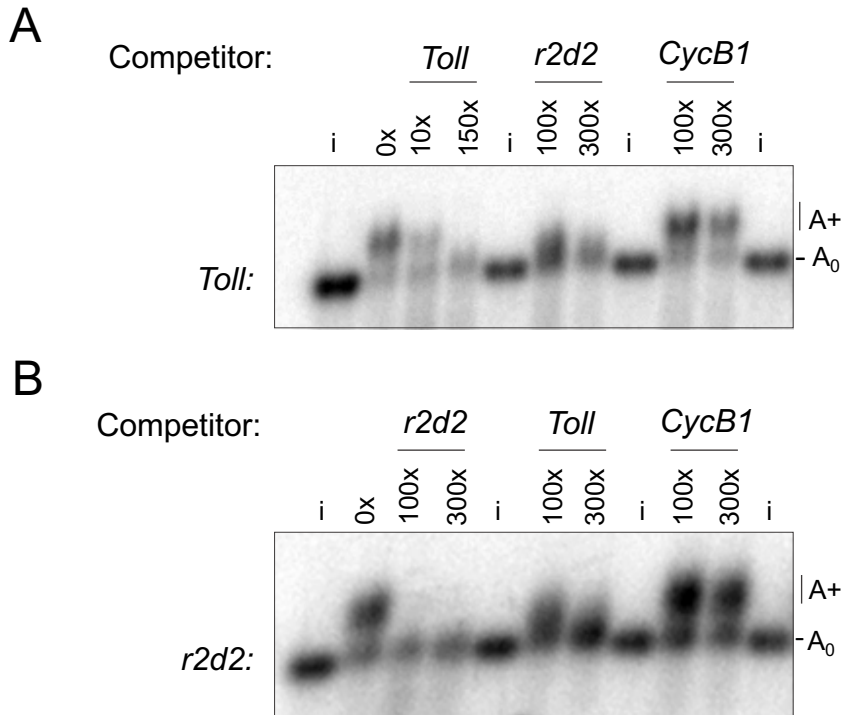

*Toll* and *r2d2* mRNAs share non-canonical polyadenylation factors. Polyadenylation competition assays of *Toll* (A) and *r2d2* (B) 3' UTRs with the indicated molar excess of cold competitor RNAs. Cyclin B1 (*CycB1*) is a typical vertebrate polyadenylation substrate containing three CPEs and one hexanucleotide. i, input.
