# Supplementary material for: Dicer-2 promotes mRNA activation through cytoplasmic polyadenylation
Source: PubMed Central journal article supplement (PMC5855953; doi:10.1261/rna.065417.117), 2018-04
Supplement: supp_065417.117_Supplemental_Fig_S3.pdf [file supp_065417.117_Supplemental_Fig_S3.pdf]

**Coll\_Fig S3**

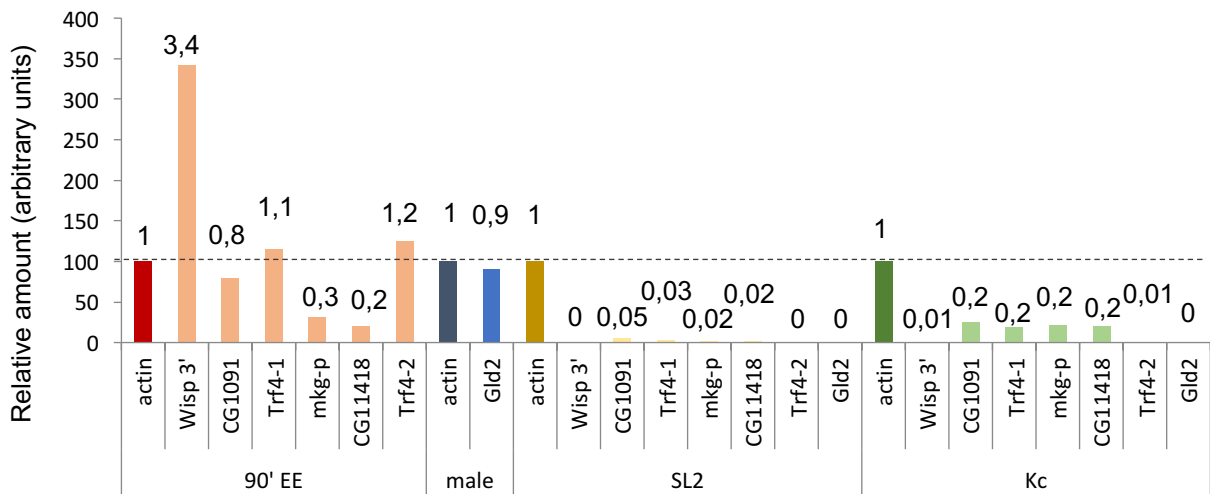

Expression of cytoplasmic poly(A) polymerases in *Drosophila* embryos and cultured cells. The levels of mRNAs encoding different cytoplasmic poly(A) polymerases in 90 min embryo extracts (90' EE), SL2 and Kc cells were assessed by RT-qPCR, and the data represented relative to actin mRNA levels. Extracts from adult males were used as control for Gld-2. Numbers on top of each bar indicate the amount relative to actin.
